# Supplementary material for: First Description of the Mitogenome and Phylogeny of Culicinae Species from the Amazon Region
Source: MDPI journal article supplement (doi:10.3390/genes12121983), 2021-12-14

*Coquillettidia nigricans*

**Alanine (A)**

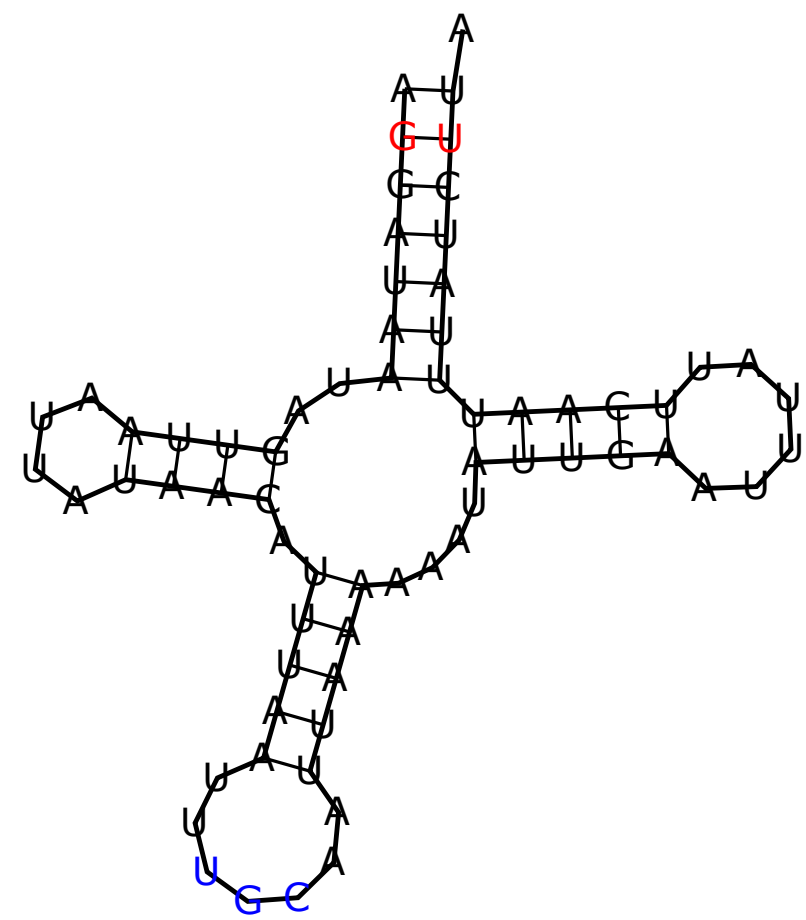

**Arginine (R)**

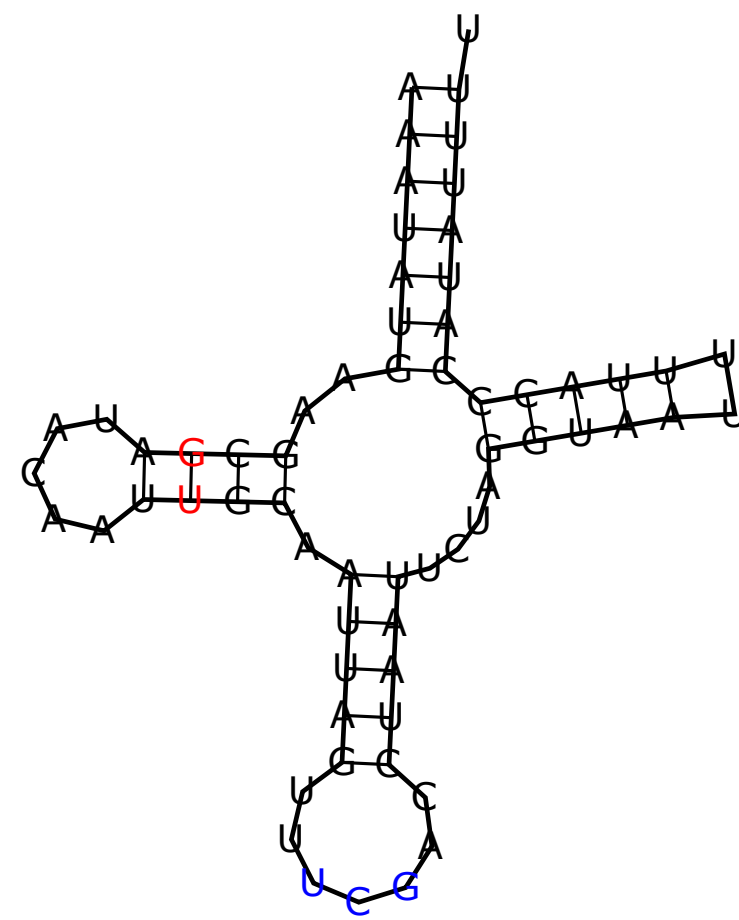

**Asparagine (N)**

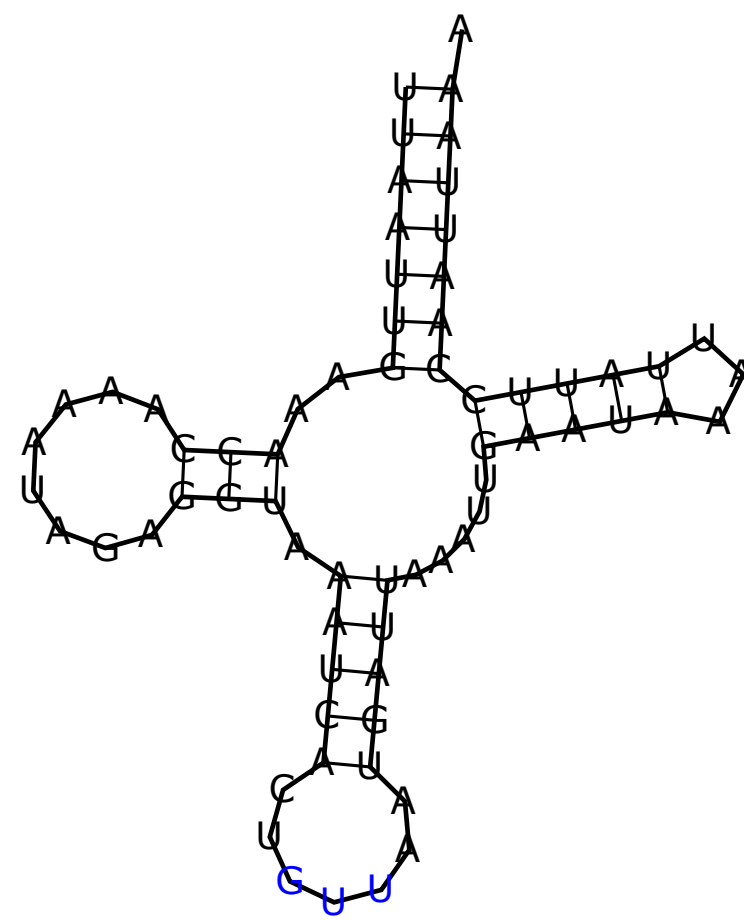

**Aspartate (D)**

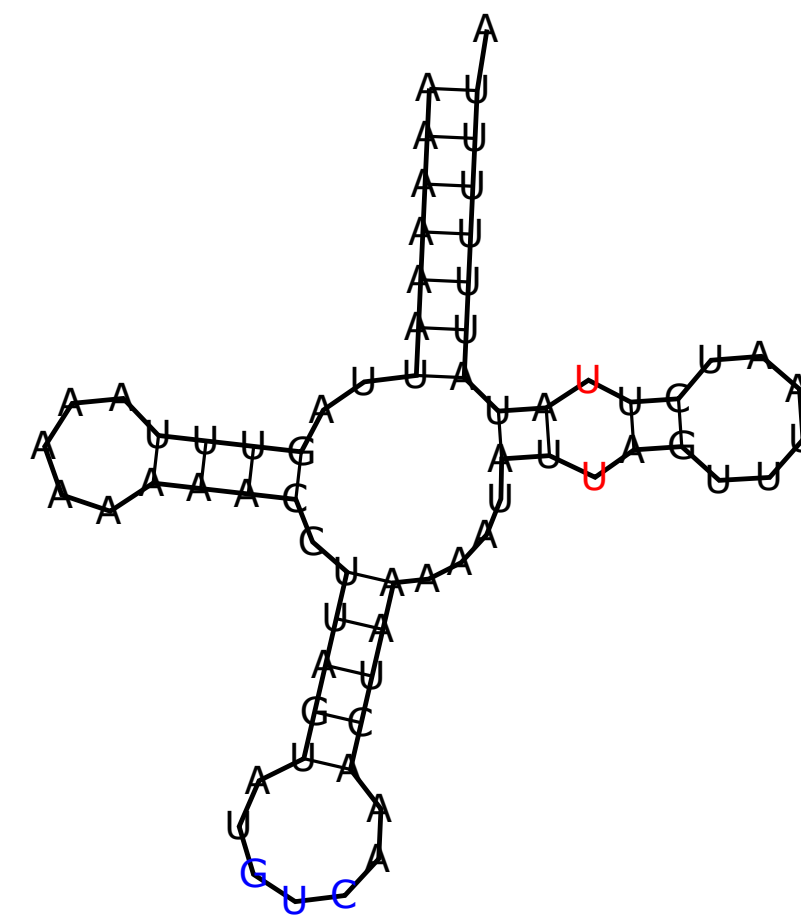

**Cysteine (C)**

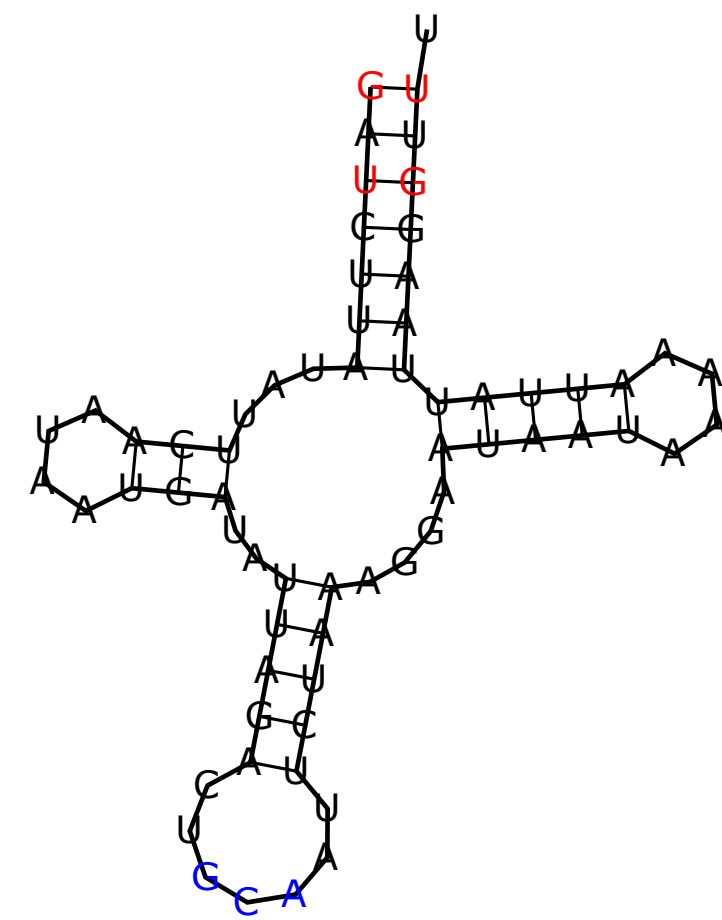

**Glutamate (E)**

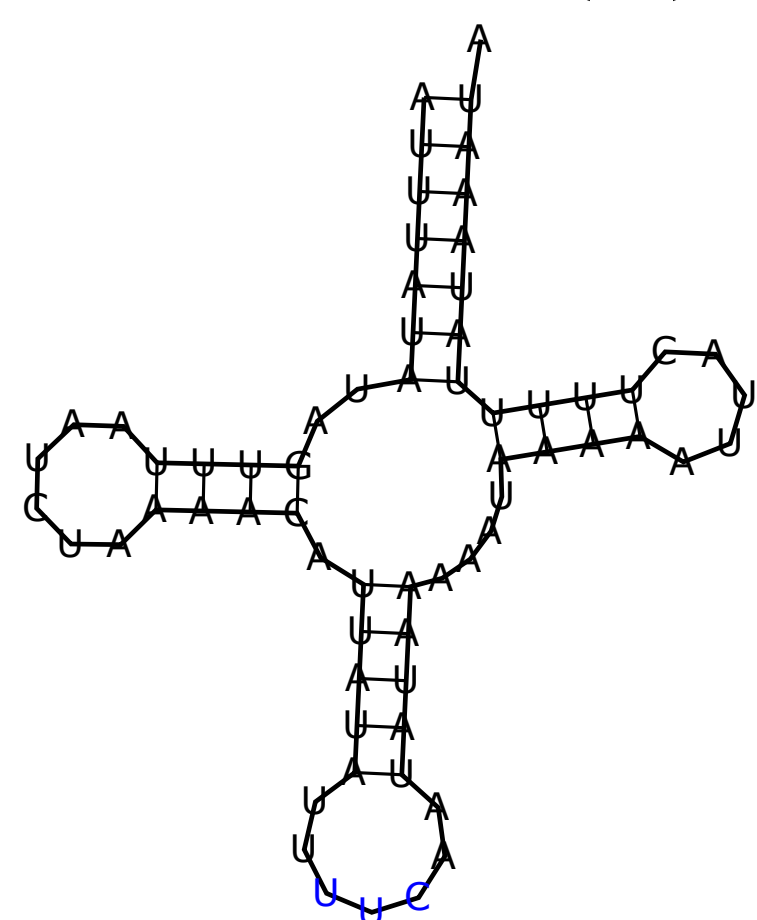

**Glutamine (Q)**

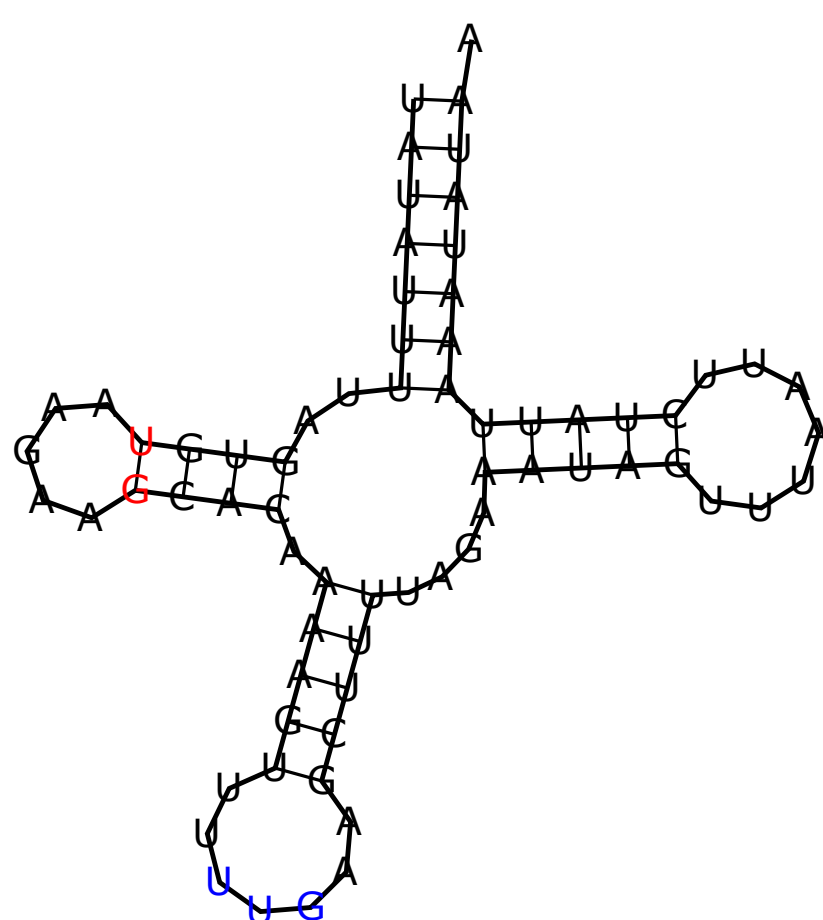

**Glycine (G)**

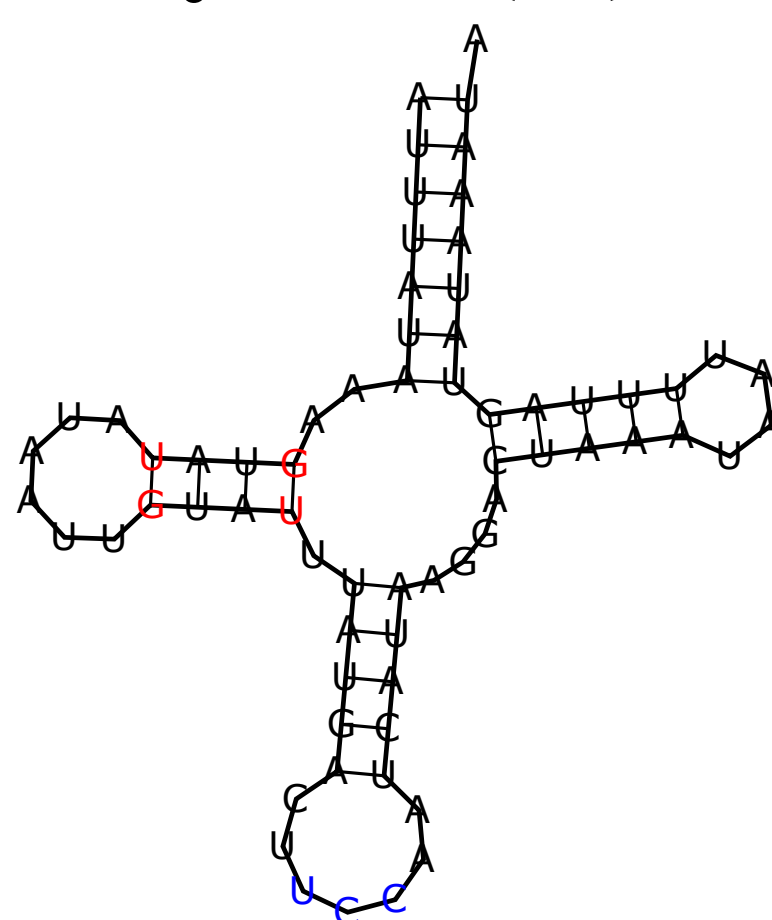

**Histidine (H)**

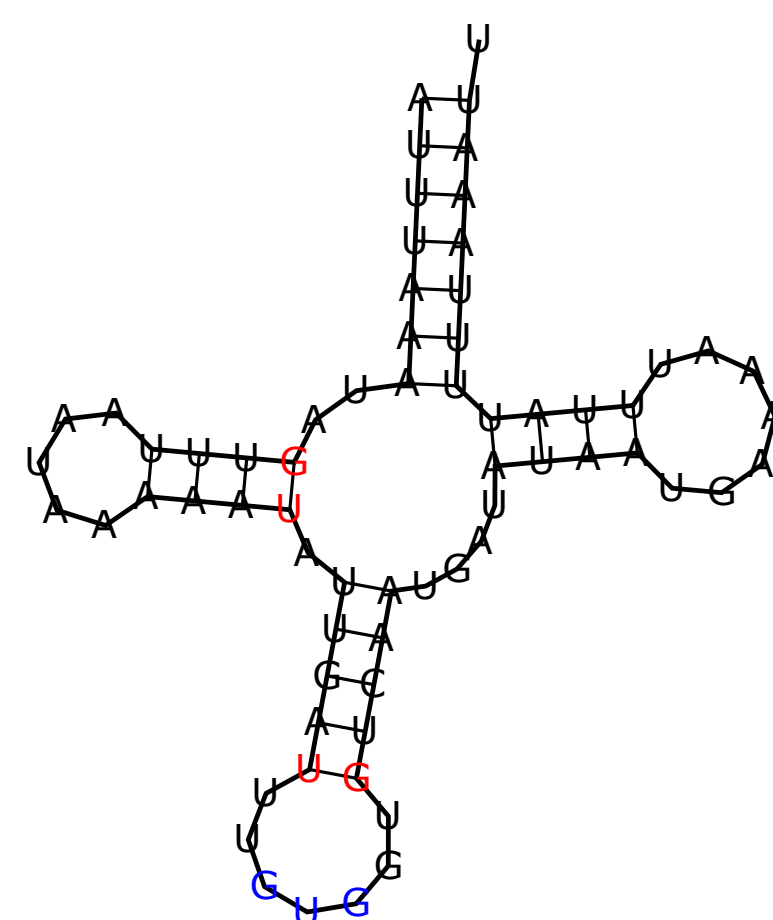

**Isoleucine (I)**

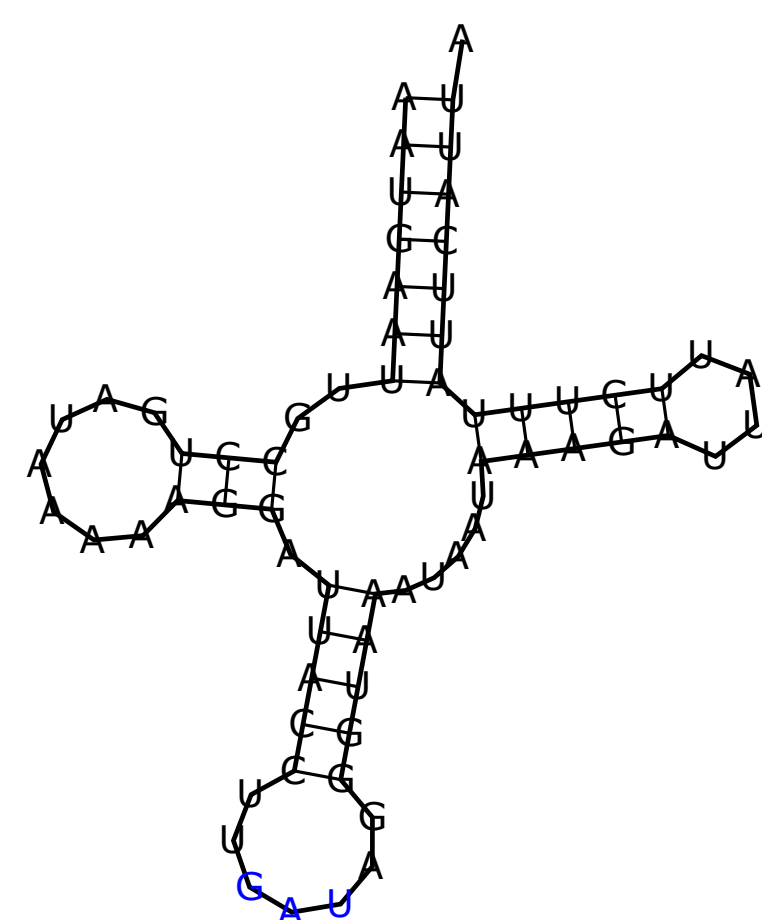

**Leucine (L1)**

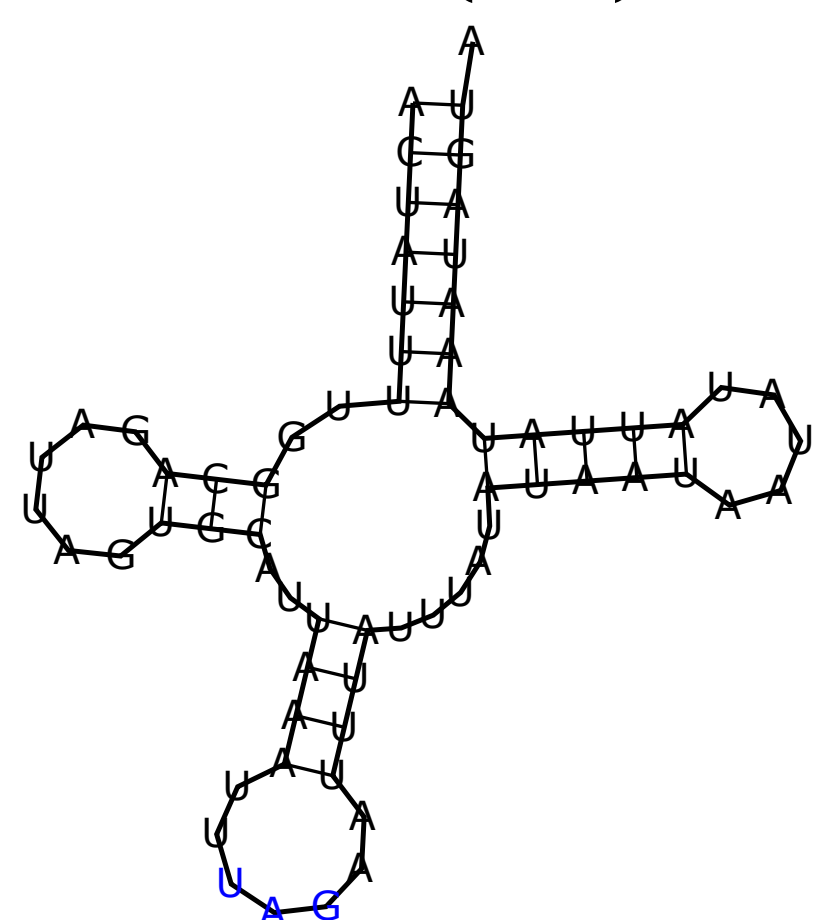

**Leucine (L2)**

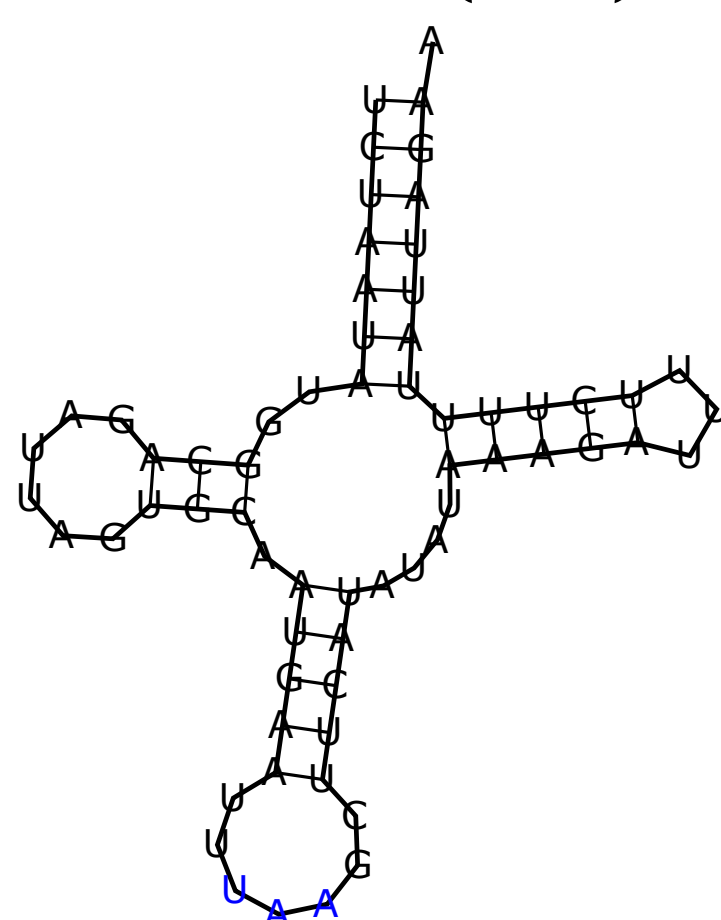

**Lysine (K)**

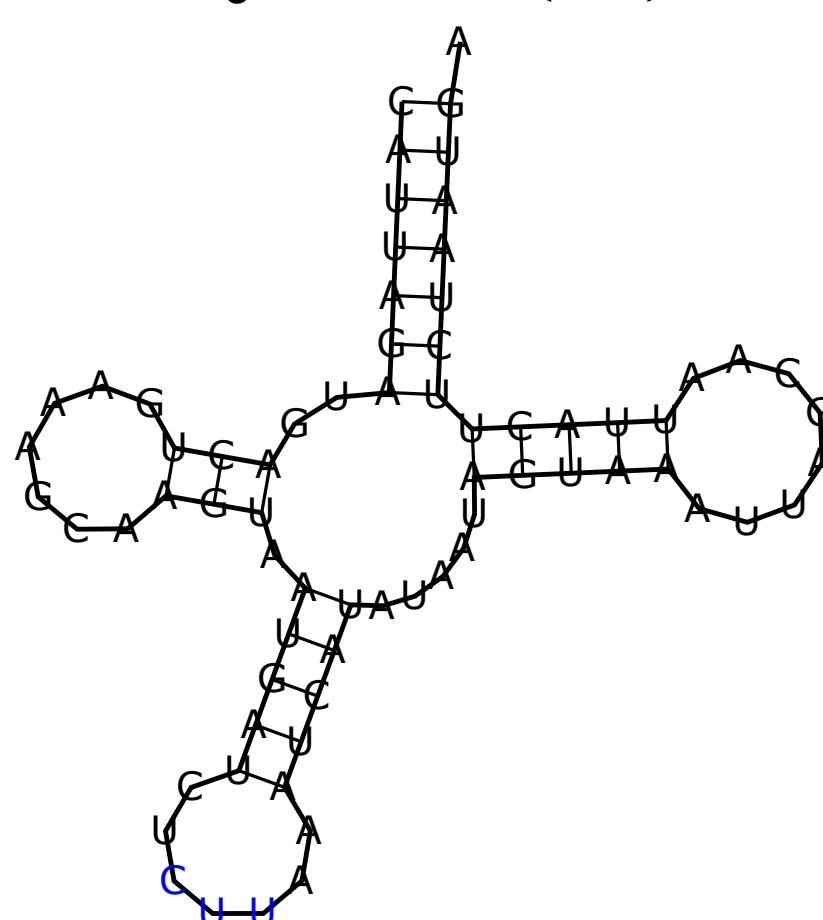

**Methionine (M)**

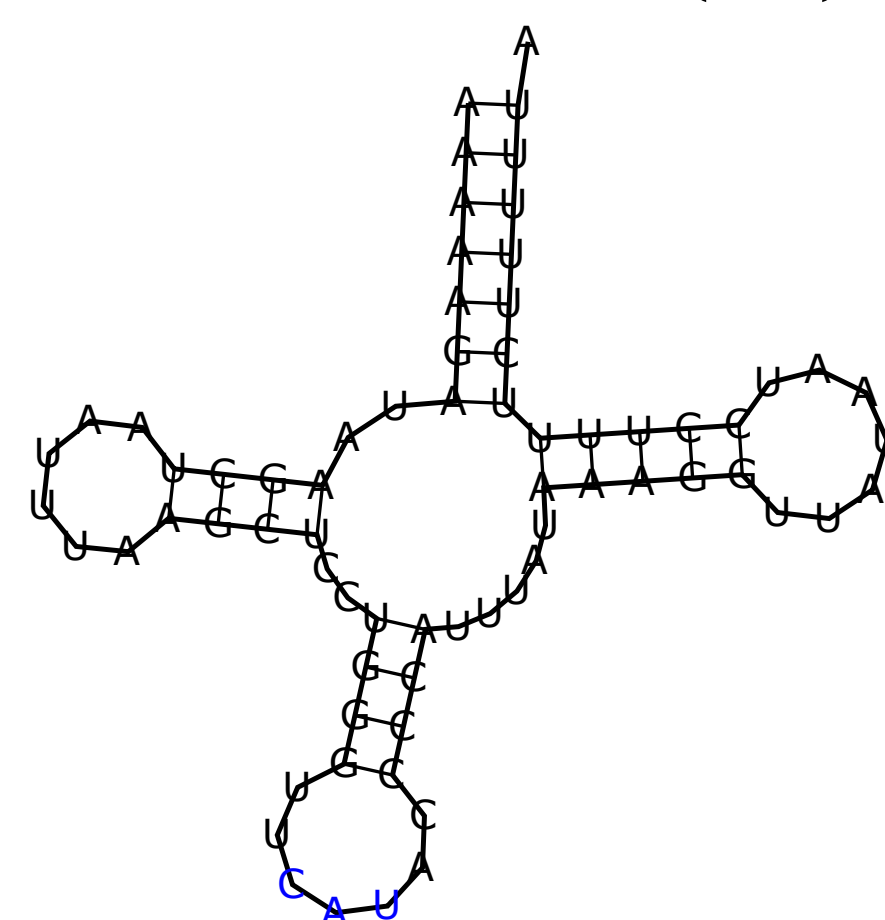

**Phenylalanine (F)**

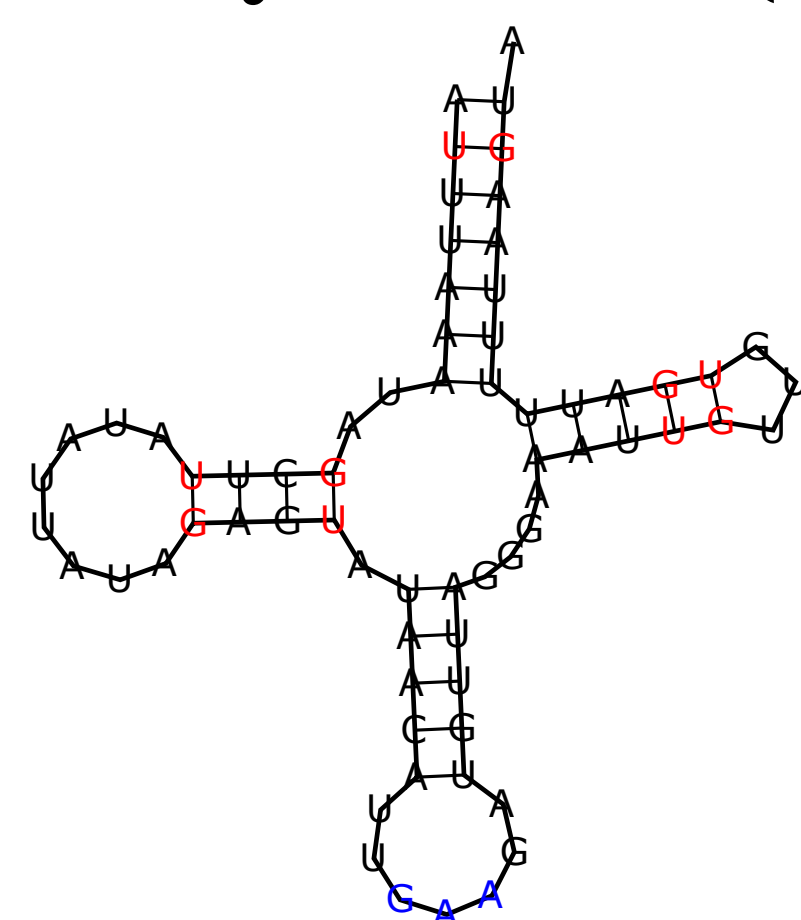

**Proline (P)**

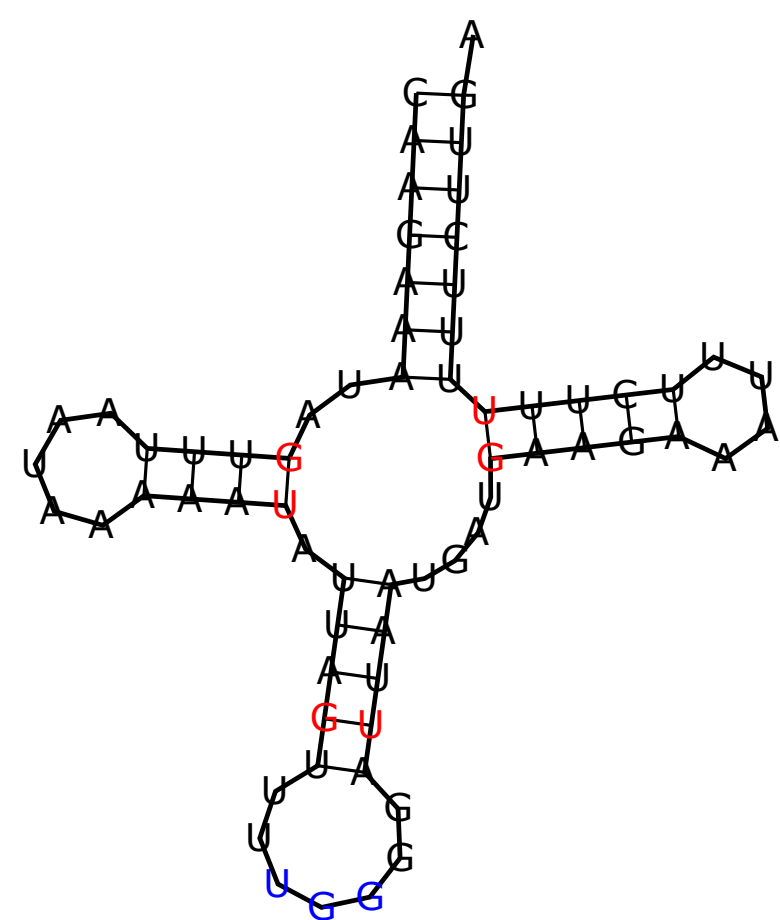

**Serine (S1)**

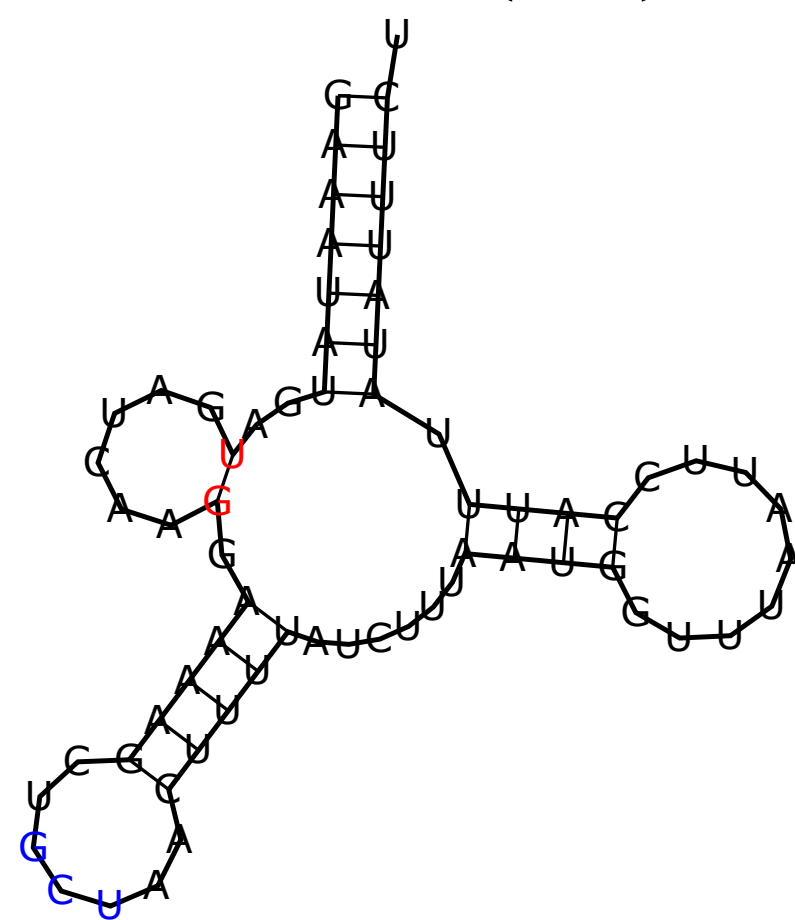

**Serine (S2)**

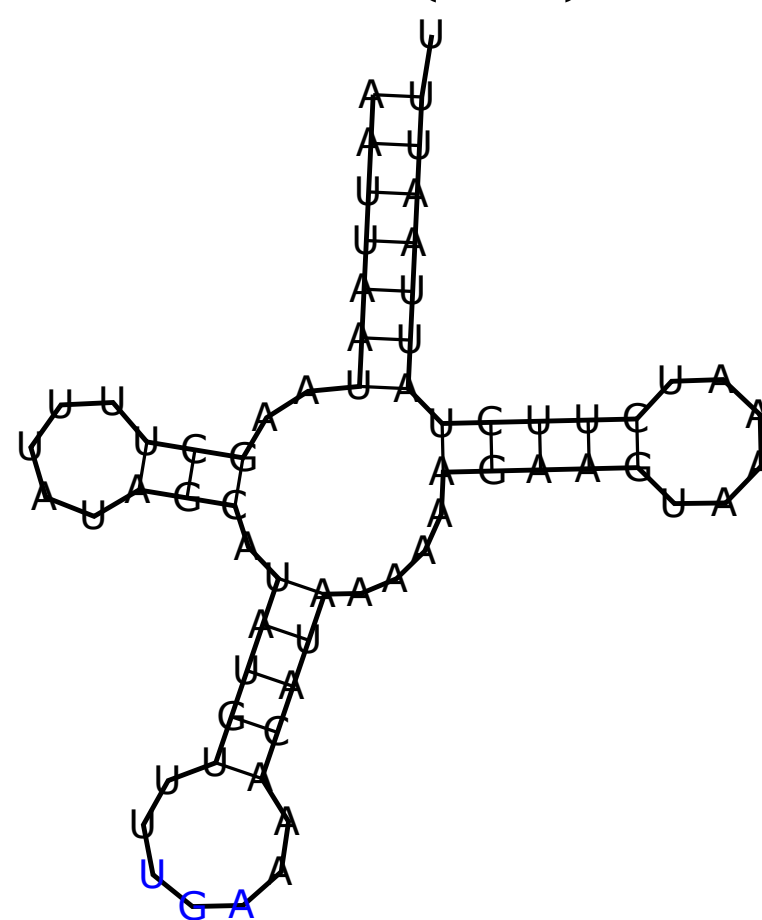

**Threonine (T)**

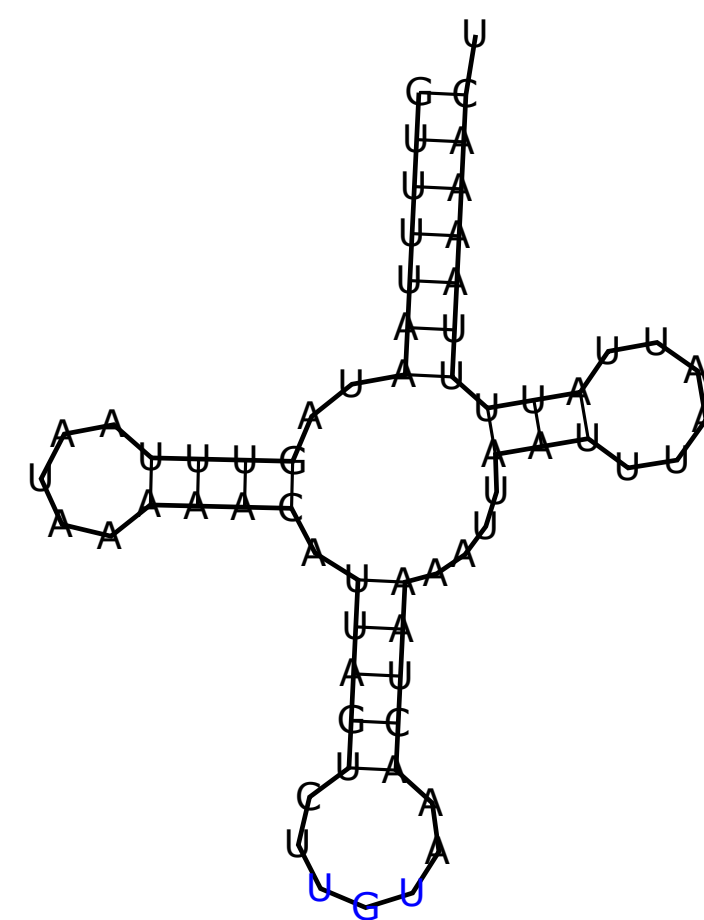

**Tryptophan (W)**

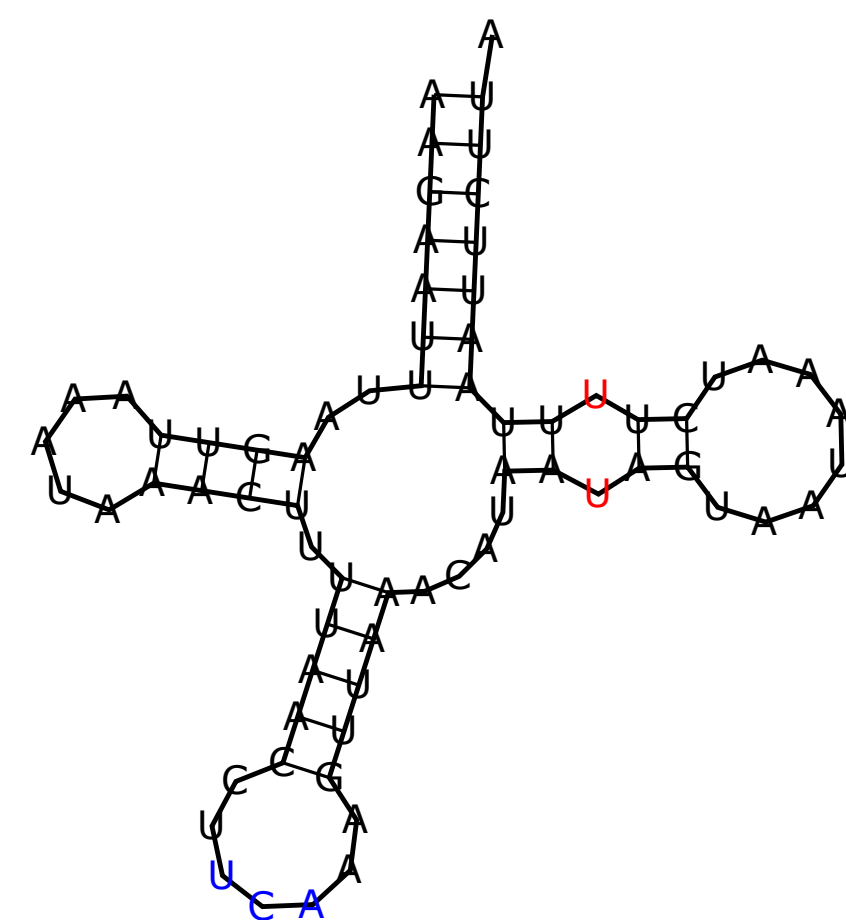

**Tyrosine (Y)**

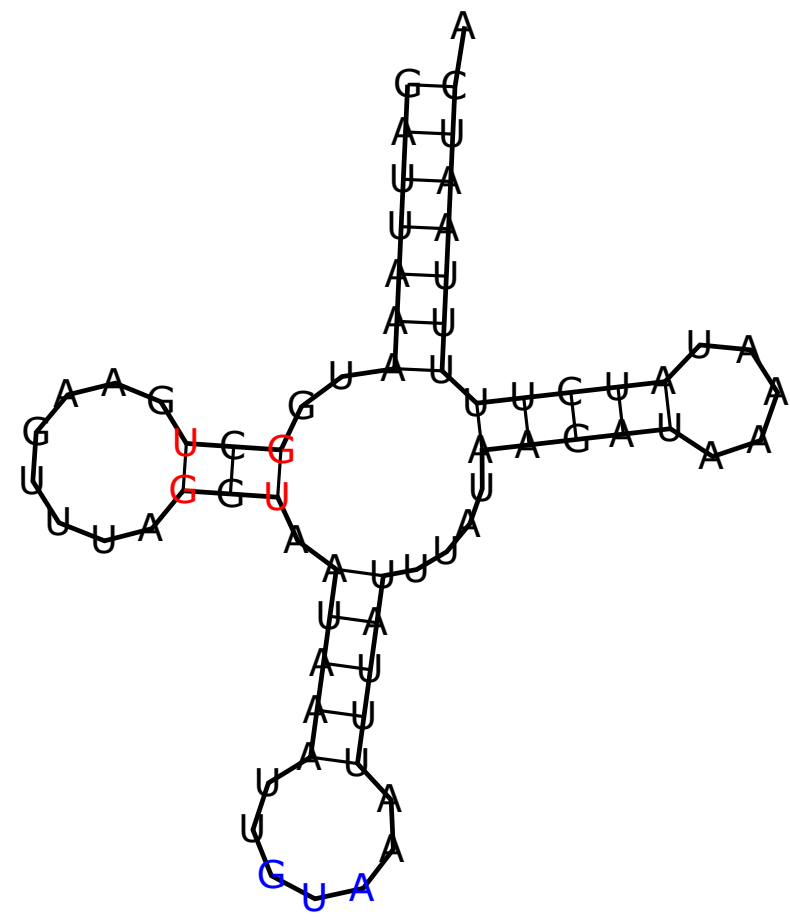

**Valine (V)**

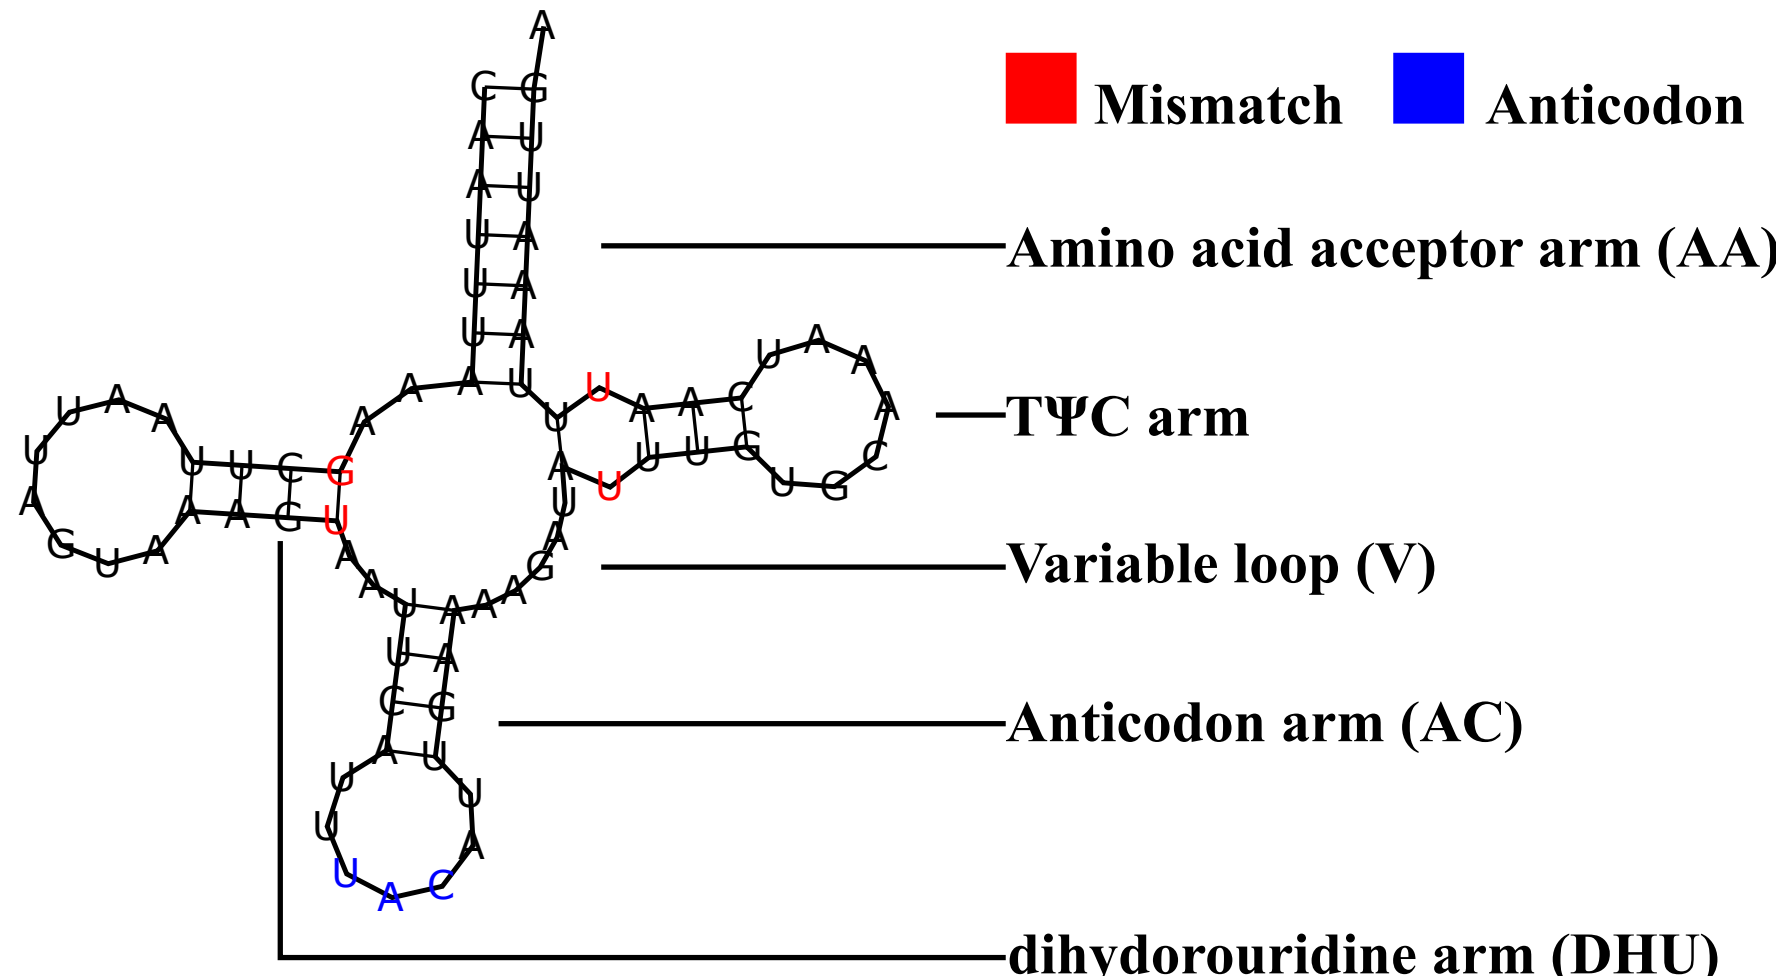

Supplement: s1 [file s1]
